# Supplementary material
Source: PubMed Central journal article supplement (PMC2705875)
Supplement: NIHMS115424-supplement-02.pdf [file NIHMS115424-supplement-02.pdf]

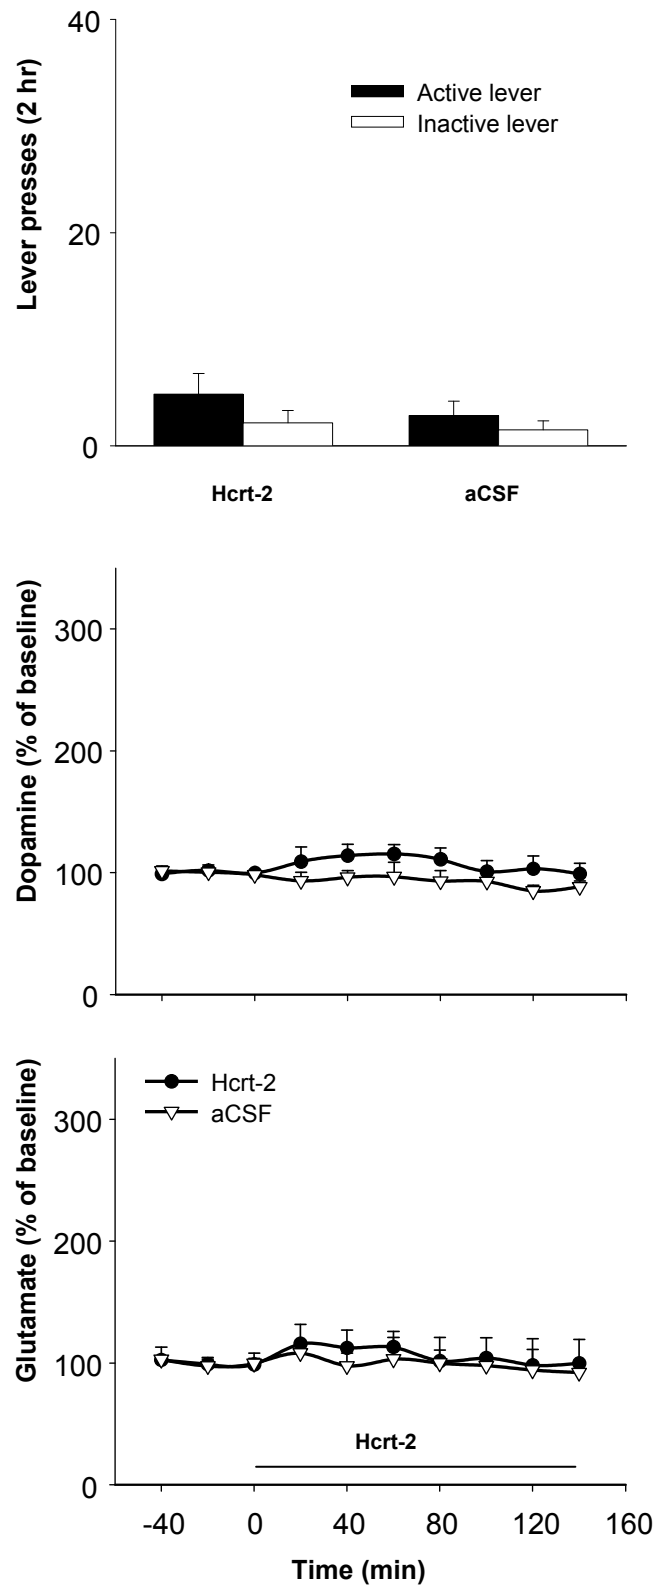

Figure S1. VTA perfusion of Hcrt-2 (10 $\mu$ M), a peptide that preferentially acts at Hcrt-2 receptors did not affect VTA dopamine or glutamate levels and did not reinstate cocaine-seeking.
