# Supplementary material
Source: PubMed Central journal article supplement (PMC2705875)
Supplement: NIHMS115424-supplement-03.pdf [file NIHMS115424-supplement-03.pdf]

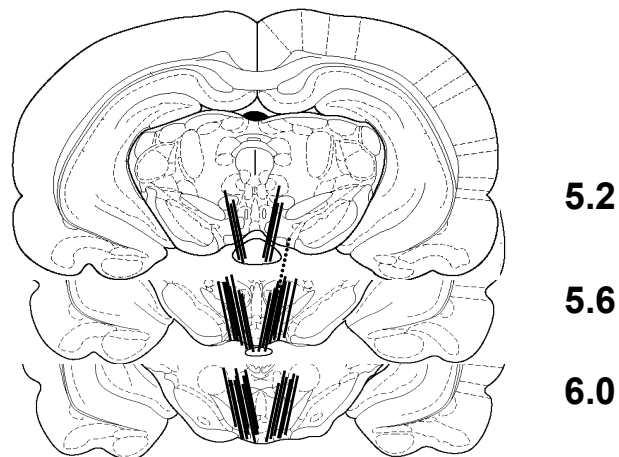

Figure S2. Probe placements. Angled vertical lines indicate the positions of the active portions of the dialysis membranes. The dorsal placement of the probe in the excluded rat is shown as a dotted line indicates. The number of lines appears less than the number of animals due to overlap in the placements. Drawings were adapted from the atlas of Paxinos and Watson, 1998 (1). The numbers on the right side of the drawings indicate the distance (mm) posterior to the bregma.

1. Paxinos G, Watson C (1998): *The rat brain in stereotaxic coordinates*, Ed.4: San Diego: Academic Press.
